# Supplementary material for: On the directionality of anion–π interactions
Source: Royal Society of Chemistry journal article supplement (doi:10.1039/c0cp01894e), 2011-01-01
Supplement: c0cp01894e.pdf [file c0cp01894e.pdf]

**Supplementary Information File for the article:**

**On the directionality of anion– $\pi$  interactions**

**Carolina Estarellas, Antonio Bauzá, Antonio Frontera,\* David Quiñonero, and Pere M. Deyà**

**Summary:**

Cartesian Coordinates

Pages 2-14

**Hexafluorobenzene, Z = 3.05**

**o:**

Energy = -1283.432129990

|    |            |            |            |
|----|------------|------------|------------|
| C  | -1.2083170 | 0.6976220  | -0.2446138 |
| C  | -1.2083170 | -0.6976220 | -0.2446138 |
| C  | 0.0000000  | -1.3952450 | -0.2446138 |
| C  | 1.2083170  | -0.6976220 | -0.2446138 |
| C  | 1.2083170  | 0.6976220  | -0.2446138 |
| C  | 0.0000000  | 1.3952450  | -0.2446138 |
| F  | 2.3781050  | -1.3729990 | -0.2227768 |
| F  | 0.0000000  | -2.7459990 | -0.2227768 |
| F  | -2.3781050 | -1.3729990 | -0.2227768 |
| F  | 2.3781050  | 1.3729990  | -0.2227768 |
| F  | 0.0000000  | 2.7459990  | -0.2227768 |
| F  | -2.3781050 | 1.3729990  | -0.2227768 |
| Cl | 0.0000000  | 0.0000000  | 2.8043442  |

**x<sub>1</sub>:**

Energy = -1283.432060957

|    |            |            |            |
|----|------------|------------|------------|
| C  | 0.6707904  | -0.2446138 | -1.2083170 |
| C  | -0.7244536 | -0.2446138 | -1.2083170 |
| C  | -1.4220766 | -0.2446138 | 0.0000000  |
| C  | -0.7244536 | -0.2446138 | 1.2083170  |
| C  | 0.6707904  | -0.2446138 | 1.2083170  |
| C  | 1.3684134  | -0.2446138 | 0.0000000  |
| F  | -1.3998306 | -0.2227768 | 2.3781050  |
| F  | -2.7728306 | -0.2227768 | 0.0000000  |
| F  | -1.3998306 | -0.2227768 | -2.3781050 |
| F  | 1.3461674  | -0.2227768 | 2.3781050  |
| F  | 2.7191674  | -0.2227768 | 0.0000000  |
| F  | 1.3461674  | -0.2227768 | -2.3781050 |
| Cl | 0.3219794  | 2.8043442  | 0.0000000  |

**x<sub>2</sub>:**

Energy = -1283.431911741

|    |            |            |            |
|----|------------|------------|------------|
| C  | 0.6439588  | -0.2446138 | -1.2083170 |
| C  | -0.7512852 | -0.2446138 | -1.2083170 |
| C  | -1.4489082 | -0.2446138 | 0.0000000  |
| C  | -0.7512852 | -0.2446138 | 1.2083170  |
| C  | 0.6439588  | -0.2446138 | 1.2083170  |
| C  | 1.3415818  | -0.2446138 | 0.0000000  |
| F  | -1.4266622 | -0.2227768 | 2.3781050  |
| F  | -2.7996622 | -0.2227768 | 0.0000000  |
| F  | -1.4266622 | -0.2227768 | -2.3781050 |
| F  | 1.3193358  | -0.2227768 | 2.3781050  |
| F  | 2.6923358  | -0.2227768 | 0.0000000  |
| F  | 1.3193358  | -0.2227768 | -2.3781050 |
| Cl | 0.6439588  | 2.8043442  | 0.0000000  |

**x<sub>3</sub>:**

Energy = -1283.431743898

|   |            |            |            |
|---|------------|------------|------------|
| C | 0.6171272  | -0.2446138 | -1.2083170 |
| C | -0.7781168 | -0.2446138 | -1.2083170 |
| C | -1.4757398 | -0.2446138 | 0.0000000  |
| C | -0.7781168 | -0.2446138 | 1.2083170  |
| C | 0.6171272  | -0.2446138 | 1.2083170  |
| C | 1.3147502  | -0.2446138 | 0.0000000  |
| F | -1.4534938 | -0.2227768 | 2.3781050  |
| F | -2.8264938 | -0.2227768 | 0.0000000  |
| F | -1.4534938 | -0.2227768 | -2.3781050 |
| F | 1.2925042  | -0.2227768 | 2.3781050  |
| F | 2.6655042  | -0.2227768 | 0.0000000  |
| F | 1.2925042  | -0.2227768 | -2.3781050 |

```
C1      0.9659382      2.8043442      0.0000000
X4:
Energy = -1283.431439370
C       0.5902955     -0.2446138     -1.2083170
C      -0.8049485     -0.2446138     -1.2083170
C      -1.5025715     -0.2446138      0.0000000
C      -0.8049485     -0.2446138      1.2083170
C       0.5902955     -0.2446138      1.2083170
C       1.2879185     -0.2446138      0.0000000
F      -1.4803255     -0.2227768      2.3781050
F      -2.8533255     -0.2227768      0.0000000
F      -1.4803255     -0.2227768     -2.3781050
F       1.2656725     -0.2227768      2.3781050
F       2.6386725     -0.2227768      0.0000000
F       1.2656725     -0.2227768     -2.3781050
C1      1.2879185      2.8043442      0.0000000
Y1:
Energy = -1283.432077076
C      -1.2315538      0.2446138      0.6976220
C      -1.2315538      0.2446138     -0.6976220
C      -0.0232368      0.2446138     -1.3952450
C       1.1850802      0.2446138     -0.6976220
C       1.1850802      0.2446138      0.6976220
C      -0.0232368      0.2446138      1.3952450
F       2.3548682      0.2227768     -1.3729990
F      -0.0232368      0.2227768     -2.7459990
F      -2.4013418      0.2227768     -1.3729990
F       2.3548682      0.2227768      1.3729990
F      -0.0232368      0.2227768      2.7459990
F      -2.4013418      0.2227768      1.3729990
C1      0.2788422     -2.8043442      0.0000000
Y2:
Energy = -1283.431954402
C      -1.2547908      0.2446138      0.6976220
C      -1.2547908      0.2446138     -0.6976220
C      -0.0464738      0.2446138     -1.3952450
C       1.1618432      0.2446138     -0.6976220
C       1.1618432      0.2446138      0.6976220
C      -0.0464738      0.2446138      1.3952450
F       2.3316312      0.2227768     -1.3729990
F      -0.0464738      0.2227768     -2.7459990
F      -2.4245788      0.2227768     -1.3729990
F       2.3316312      0.2227768      1.3729990
F      -0.0464738      0.2227768      2.7459990
F      -2.4245788      0.2227768      1.3729990
C1      0.5576852     -2.8043442      0.0000000
Y3:
Energy = -1283.431820937
C      -1.2780276      0.2446138      0.6976220
C      -1.2780276      0.2446138     -0.6976220
C      -0.0697106      0.2446138     -1.3952450
C       1.1386064      0.2446138     -0.6976220
C       1.1386064      0.2446138      0.6976220
C      -0.0697106      0.2446138      1.3952450
F       2.3083944      0.2227768     -1.3729990
F      -0.0697106      0.2227768     -2.7459990
F      -2.4478156      0.2227768     -1.3729990
F       2.3083944      0.2227768      1.3729990
F      -0.0697106      0.2227768      2.7459990
F      -2.4478156      0.2227768      1.3729990
C1      0.8365274     -2.8043442      0.0000000
```

**Y<sub>4</sub>:**

Energy = -1283.431667446  
C -1.3012645 0.2446138 0.6976220  
C -1.3012645 0.2446138 -0.6976220  
C -0.0929475 0.2446138 -1.3952450  
C 1.1153695 0.2446138 -0.6976220  
C 1.1153695 0.2446138 0.6976220  
C -0.0929475 0.2446138 1.3952450  
F 2.2851575 0.2227768 -1.3729990  
F -0.0929475 0.2227768 -2.7459990  
F -2.4710525 0.2227768 -1.3729990  
F 2.2851575 0.2227768 1.3729990  
F -0.0929475 0.2227768 2.7459990  
F -2.4710525 0.2227768 1.3729990  
Cl 1.1153695 -2.8043442 0.0000000  
Y = 0

**Z<sub>1</sub>:**

Energy = -1283.434208836  
C -1.2083170 0.6976220 -0.2715369  
C -1.2083170 -0.6976220 -0.2715369  
C 0.0000000 -1.3952450 -0.2715369  
C 1.2083170 -0.6976220 -0.2715369  
C 1.2083170 0.6976220 -0.2715369  
C 0.0000000 1.3952450 -0.2715369  
F 2.3781050 -1.3729990 -0.2496999  
F 0.0000000 -2.7459990 -0.2496999  
F -2.3781050 -1.3729990 -0.2496999  
F 2.3781050 1.3729990 -0.2496999  
F 0.0000000 2.7459990 -0.2496999  
F -2.3781050 1.3729990 -0.2496999  
Cl 0.0000000 0.0000000 3.1274211

**Z<sub>2</sub>:**

Energy = -1283.432622854  
C -1.2083170 0.6976220 -0.2984600  
C -1.2083170 -0.6976220 -0.2984600  
C 0.0000000 -1.3952450 -0.2984600  
C 1.2083170 -0.6976220 -0.2984600  
C 1.2083170 0.6976220 -0.2984600  
C 0.0000000 1.3952450 -0.2984600  
F 2.3781050 -1.3729990 -0.2766230  
F 0.0000000 -2.7459990 -0.2766230  
F -2.3781050 -1.3729990 -0.2766230  
F 2.3781050 1.3729990 -0.2766230  
F 0.0000000 2.7459990 -0.2766230  
F -2.3781050 1.3729990 -0.2766230  
Cl 0.0000000 0.0000000 3.4504980

**Z<sub>3</sub>:**

Energy = -1283.430312282  
C -1.2083170 0.6976220 -0.3253831  
C -1.2083170 -0.6976220 -0.3253831  
C 0.0000000 -1.3952450 -0.3253831  
C 1.2083170 -0.6976220 -0.3253831  
C 1.2083170 0.6976220 -0.3253831  
C 0.0000000 1.3952450 -0.3253831  
F 2.3781050 -1.3729990 -0.3035461  
F 0.0000000 -2.7459990 -0.3035461  
F -2.3781050 -1.3729990 -0.3035461  
F 2.3781050 1.3729990 -0.3035461  
F 0.0000000 2.7459990 -0.3035461  
F -2.3781050 1.3729990 -0.3035461

```
C1      0.0000000    0.0000000    3.7735749
Z4:
Energy = -1283.428068126
C      -1.2083170    0.6976220   -0.3523062
C      -1.2083170   -0.6976220   -0.3523062
C       0.0000000   -1.3952450   -0.3523062
C       1.2083170   -0.6976220   -0.3523062
C       1.2083170    0.6976220   -0.3523062
C       0.0000000    1.3952450   -0.3523062
F       2.3781050   -1.3729990   -0.3304692
F       0.0000000   -2.7459990   -0.3304692
F      -2.3781050   -1.3729990   -0.3304692
F       2.3781050    1.3729990   -0.3304692
F       0.0000000    2.7459990   -0.3304692
F      -2.3781050    1.3729990   -0.3304692
C1      0.0000000    0.0000000    4.0966518
XZ1:
Energy = -1283.433797159
C       0.6439588   -0.2715369   -1.2083170
C      -0.7512852   -0.2715369   -1.2083170
C      -1.4489082   -0.2715369    0.0000000
C      -0.7512852   -0.2715369    1.2083170
C       0.6439588   -0.2715369    1.2083170
C       1.3415818   -0.2715369    0.0000000
F      -1.4266622   -0.2496999    2.3781050
F      -2.7996622   -0.2496999    0.0000000
F      -1.4266622   -0.2496999   -2.3781050
F       1.3193358   -0.2496999    2.3781050
F       2.6923358   -0.2496999    0.0000000
F       1.3193358   -0.2496999   -2.3781050
C1      0.6439588    3.1274211    0.0000000
XZ2:
Energy = -1283.432525807
C       0.6707904   -0.2984600   -1.2083170
C      -0.7244536   -0.2984600   -1.2083170
C      -1.4220766   -0.2984600    0.0000000
C      -0.7244536   -0.2984600    1.2083170
C       0.6707904   -0.2984600    1.2083170
C       1.3684134   -0.2984600    0.0000000
F      -1.3998306   -0.2766230    2.3781050
F      -2.7728306   -0.2766230    0.0000000
F      -1.3998306   -0.2766230   -2.3781050
F       1.3461674   -0.2766230    2.3781050
F       2.7191674   -0.2766230    0.0000000
F       1.3461674   -0.2766230   -2.3781050
C1      0.3219794    3.4504980    0.0000000
XZ3:
Energy = -1283.429513105
C       0.6171272   -0.3253831   -1.2083170
C      -0.7781168   -0.3253831   -1.2083170
C      -1.4757398   -0.3253831    0.0000000
C      -0.7781168   -0.3253831    1.2083170
C       0.6171272   -0.3253831    1.2083170
C       1.3147502   -0.3253831    0.0000000
F      -1.4534938   -0.3035461    2.3781050
F      -2.8264938   -0.3035461    0.0000000
F      -1.4534938   -0.3035461   -2.3781050
F       1.2925042   -0.3035461    2.3781050
F       2.6655042   -0.3035461    0.0000000
F       1.2925042   -0.3035461   -2.3781050
C1      0.9659382    3.7735749    0.0000000
```

**xz<sub>4</sub>:**

Energy = -1283.426849024  
C 0.5902955 -0.3523062 -1.2083170  
C -0.8049485 -0.3523062 -1.2083170  
C -1.5025715 -0.3523062 0.0000000  
C -0.8049485 -0.3523062 1.2083170  
C 0.5902955 -0.3523062 1.2083170  
C 1.2879185 -0.3523062 0.0000000  
F -1.4803255 -0.3304692 2.3781050  
F -2.8533255 -0.3304692 0.0000000  
F -1.4803255 -0.3304692 -2.3781050  
F 1.2656725 -0.3304692 2.3781050  
F 2.6386725 -0.3304692 0.0000000  
F 1.2656725 -0.3304692 -2.3781050  
Cl 1.2879185 4.0966518 0.0000000

**Trifluorotriazine, z = 2.94**

**o:**

Energy = -1034.933760665  
C -1.1666259 -0.4811915 -0.2927560  
C 1.0000551 -0.7697735 -0.2742160  
C 0.1664051 1.2507365 -0.2731060  
N 1.2786851 0.5274295 -0.2906460  
N -1.0959479 0.8438505 -0.3114360  
N -0.1824279 -1.3709735 -0.3128460  
F 2.0595951 -1.5865135 -0.2859760  
F -2.4033249 -0.9910835 -0.3240260  
F 0.3435631 2.5775065 -0.2842460  
Cl 0.0000231 0.0000125 2.6492540

**x<sub>1</sub>:**

Energy = -1034.933471558  
C -1.1707854 -0.5124596 -0.2927560  
C 0.9958956 -0.8010416 -0.2742160  
C 0.1622456 1.2194684 -0.2731060  
N 1.2745256 0.4961614 -0.2906460  
N -1.1001074 0.8125824 -0.3114360  
N -0.1865874 -1.4022416 -0.3128460  
F 2.0554356 -1.6177816 -0.2859760  
F -2.4074844 -1.0223516 -0.3240260  
F 0.3394036 2.5462384 -0.2842460  
Cl 0.0374586 0.2814254 2.6492540

**x<sub>2</sub>:**

Energy = -1034.932954925  
C -1.1749450 -0.5437277 -0.2927560  
C 0.9917360 -0.8323097 -0.2742160  
C 0.1580860 1.1882003 -0.2731060  
N 1.2703660 0.4648933 -0.2906460  
N -1.1042670 0.7813143 -0.3114360  
N -0.1907470 -1.4335097 -0.3128460  
F 2.0512760 -1.6490497 -0.2859760  
F -2.4116440 -1.0536197 -0.3240260  
F 0.3352440 2.5149703 -0.2842460  
Cl 0.0748950 0.5628383 2.6492540

**x<sub>3</sub>:**

Energy = -1034.932381922  
C -1.1791046 -0.5749958 -0.2927560  
C 0.9875764 -0.8635778 -0.2742160  
C 0.1539264 1.1569322 -0.2731060  
N 1.2662064 0.4336252 -0.2906460  
N -1.1084266 0.7500462 -0.3114360  
N -0.1949066 -1.4647778 -0.3128460

|    |            |            |            |
|----|------------|------------|------------|
| F  | 2.0471164  | -1.6803178 | -0.2859760 |
| F  | -2.4158036 | -1.0848878 | -0.3240260 |
| F  | 0.3310844  | 2.4837022  | -0.2842460 |
| Cl | 0.1123314  | 0.8442512  | 2.6492540  |

**X<sub>4</sub>:**

Energy = -1034.931640821

|    |            |            |            |
|----|------------|------------|------------|
| C  | -1.1832641 | -0.6062639 | -0.2927560 |
| C  | 0.9834169  | -0.8948459 | -0.2742160 |
| C  | 0.1497669  | 1.1256641  | -0.2731060 |
| N  | 1.2620469  | 0.4023571  | -0.2906460 |
| N  | -1.1125861 | 0.7187781  | -0.3114360 |
| N  | -0.1990661 | -1.4960459 | -0.3128460 |
| F  | 2.0429569  | -1.7115859 | -0.2859760 |
| F  | -2.4199631 | -1.1161559 | -0.3240260 |
| F  | 0.3269249  | 2.4524341  | -0.2842460 |
| Cl | 0.1497669  | 1.1256641  | 2.6492540  |

**Y<sub>1</sub>:**

Energy = -1034.933427493

|    |            |            |            |
|----|------------|------------|------------|
| C  | -1.1951094 | -0.4781619 | -0.2927560 |
| C  | 0.9715716  | -0.7667439 | -0.2742160 |
| C  | 0.1379216  | 1.2537661  | -0.2731060 |
| N  | 1.2502016  | 0.5304591  | -0.2906460 |
| N  | -1.1244314 | 0.8468801  | -0.3114360 |
| N  | -0.2109114 | -1.3679439 | -0.3128460 |
| F  | 2.0311116  | -1.5834839 | -0.2859760 |
| F  | -2.4318084 | -0.9880539 | -0.3240260 |
| F  | 0.3150796  | 2.5805361  | -0.2842460 |
| Cl | 0.2563746  | -0.0272539 | 2.6492540  |

**Y<sub>2</sub>:**

Energy = -1034.932662394

|    |            |            |            |
|----|------------|------------|------------|
| C  | -1.2235930 | -0.4751323 | -0.2927560 |
| C  | 0.9430880  | -0.7637143 | -0.2742160 |
| C  | 0.1094380  | 1.2567957  | -0.2731060 |
| N  | 1.2217180  | 0.5334887  | -0.2906460 |
| N  | -1.1529150 | 0.8499097  | -0.3114360 |
| N  | -0.2393950 | -1.3649143 | -0.3128460 |
| F  | 2.0026280  | -1.5804543 | -0.2859760 |
| F  | -2.4602920 | -0.9850243 | -0.3240260 |
| F  | 0.2865960  | 2.5835657  | -0.2842460 |
| Cl | 0.5127270  | -0.0545203 | 2.6492540  |

**Y<sub>3</sub>:**

Energy = -1034.931599835

|    |            |            |            |
|----|------------|------------|------------|
| C  | -1.2520761 | -0.4721026 | -0.2927560 |
| C  | 0.9146049  | -0.7606846 | -0.2742160 |
| C  | 0.0809549  | 1.2598254  | -0.2731060 |
| N  | 1.1932349  | 0.5365184  | -0.2906460 |
| N  | -1.1813981 | 0.8529394  | -0.3114360 |
| N  | -0.2678781 | -1.3618846 | -0.3128460 |
| F  | 1.9741449  | -1.5774246 | -0.2859760 |
| F  | -2.4887751 | -0.9819946 | -0.3240260 |
| F  | 0.2581129  | 2.5865954  | -0.2842460 |
| Cl | 0.7690749  | -0.0817876 | 2.6492540  |

**Y<sub>4</sub>:**

Energy = -1034.930389431

|   |            |            |            |
|---|------------|------------|------------|
| C | -1.2805601 | -0.4690730 | -0.2927560 |
| C | 0.8861209  | -0.7576550 | -0.2742160 |
| C | 0.0524709  | 1.2628550  | -0.2731060 |
| N | 1.1647509  | 0.5395480  | -0.2906460 |
| N | -1.2098821 | 0.8559690  | -0.3114360 |
| N | -0.2963621 | -1.3588550 | -0.3128460 |
| F | 1.9456609  | -1.5743950 | -0.2859760 |

|    |            |            |            |
|----|------------|------------|------------|
| F  | -2.5172591 | -0.9789650 | -0.3240260 |
| F  | 0.2296289  | 2.5896250  | -0.2842460 |
| Cl | 1.0254309  | -0.1090540 | 2.6492540  |

**xy<sub>1</sub>:**

Energy = -1034.933213766

|    |            |            |            |
|----|------------|------------|------------|
| C  | -1.1985923 | -0.4943770 | -0.2927560 |
| C  | 0.9680887  | -0.7829590 | -0.2742160 |
| C  | 0.1344387  | 1.2375510  | -0.2731060 |
| N  | 1.2467187  | 0.5142440  | -0.2906460 |
| N  | -1.1279143 | 0.8306650  | -0.3114360 |
| N  | -0.2143943 | -1.3841590 | -0.3128460 |
| F  | 2.0276287  | -1.5996990 | -0.2859760 |
| F  | -2.4352913 | -1.0042690 | -0.3240260 |
| F  | 0.3115967  | 2.5643210  | -0.2842460 |
| Cl | 0.2877207  | 0.1186820  | 2.6492540  |

**xy<sub>2</sub>:**

Energy = -1034.931784637

|    |            |            |            |
|----|------------|------------|------------|
| C  | -1.2305588 | -0.5075624 | -0.2927560 |
| C  | 0.9361222  | -0.7961444 | -0.2742160 |
| C  | 0.1024722  | 1.2243656  | -0.2731060 |
| N  | 1.2147522  | 0.5010586  | -0.2906460 |
| N  | -1.1598808 | 0.8174796  | -0.3114360 |
| N  | -0.2463608 | -1.3973444 | -0.3128460 |
| F  | 1.9956622  | -1.6128844 | -0.2859760 |
| F  | -2.4672578 | -1.0174544 | -0.3240260 |
| F  | 0.2796302  | 2.5511356  | -0.2842460 |
| Cl | 0.5754192  | 0.2373506  | 2.6492540  |

**xy<sub>3</sub>:**

Energy = -1034.929750514

|    |            |            |            |
|----|------------|------------|------------|
| C  | -1.2625251 | -0.5207478 | -0.2927560 |
| C  | 0.9041559  | -0.8093298 | -0.2742160 |
| C  | 0.0705059  | 1.2111802  | -0.2731060 |
| N  | 1.1827859  | 0.4878732  | -0.2906460 |
| N  | -1.1918471 | 0.8042942  | -0.3114360 |
| N  | -0.2783271 | -1.4105298 | -0.3128460 |
| F  | 1.9636959  | -1.6260698 | -0.2859760 |
| F  | -2.4992241 | -1.0306398 | -0.3240260 |
| F  | 0.2476639  | 2.5379502  | -0.2842460 |
| Cl | 0.8631159  | 0.3560192  | 2.6492540  |

**xy<sub>4</sub>:**

Energy = -1034.927632495

|    |            |            |            |
|----|------------|------------|------------|
| C  | -1.2944921 | -0.5339332 | -0.2927560 |
| C  | 0.8721889  | -0.8225152 | -0.2742160 |
| C  | 0.0385389  | 1.1979948  | -0.2731060 |
| N  | 1.1508189  | 0.4746878  | -0.2906460 |
| N  | -1.2238141 | 0.7911088  | -0.3114360 |
| N  | -0.3102941 | -1.4237152 | -0.3128460 |
| F  | 1.9317289  | -1.6392552 | -0.2859760 |
| F  | -2.5311911 | -1.0438252 | -0.3240260 |
| F  | 0.2156969  | 2.5247648  | -0.2842460 |
| Cl | 1.1508189  | 0.4746878  | 2.6492540  |

**Y = 0**

**z<sub>1</sub>:**

Energy = -1034.936013320

|   |            |            |            |
|---|------------|------------|------------|
| C | -1.1637365 | -0.4798534 | -0.3277560 |
| C | 1.0029445  | -0.7684354 | -0.3092160 |
| C | 0.1692945  | 1.2520746  | -0.3081060 |
| N | 1.2815745  | 0.5287676  | -0.3256460 |
| N | -1.0930585 | 0.8451886  | -0.3464360 |
| N | -0.1795385 | -1.3696354 | -0.3478460 |
| F | 2.0624845  | -1.5851754 | -0.3209760 |



|    |            |            |            |
|----|------------|------------|------------|
| F  | -2.4004355 | -0.9897454 | -0.3590260 |
| F  | 0.3464525  | 2.5788446  | -0.3192460 |
| Cl | -0.0259815 | -0.0120304 | 2.9642540  |

**Z<sub>2</sub>:**

Energy = -1034.934003808

|    |            |            |            |
|----|------------|------------|------------|
| C  | -1.1637365 | -0.4798534 | -0.3627560 |
| C  | 1.0029445  | -0.7684354 | -0.3442160 |
| C  | 0.1692945  | 1.2520746  | -0.3431060 |
| N  | 1.2815745  | 0.5287676  | -0.3606460 |
| N  | -1.0930585 | 0.8451886  | -0.3814360 |
| N  | -0.1795385 | -1.3696354 | -0.3828460 |
| F  | 2.0624845  | -1.5851754 | -0.3559760 |
| F  | -2.4004355 | -0.9897454 | -0.3940260 |
| F  | 0.3464525  | 2.5788446  | -0.3542460 |
| Cl | -0.0259815 | -0.0120304 | 3.2792540  |

**Z<sub>3</sub>:**

Energy = -1034.931051946

|    |            |            |            |
|----|------------|------------|------------|
| C  | -1.1637365 | -0.4798534 | -0.3977560 |
| C  | 1.0029445  | -0.7684354 | -0.3792160 |
| C  | 0.1692945  | 1.2520746  | -0.3781060 |
| N  | 1.2815745  | 0.5287676  | -0.3956460 |
| N  | -1.0930585 | 0.8451886  | -0.4164360 |
| N  | -0.1795385 | -1.3696354 | -0.4178460 |
| F  | 2.0624845  | -1.5851754 | -0.3909760 |
| F  | -2.4004355 | -0.9897454 | -0.4290260 |
| F  | 0.3464525  | 2.5788446  | -0.3892460 |
| Cl | -0.0259815 | -0.0120304 | 3.5942540  |

**Z<sub>4</sub>:**

Energy = -1034.928254998

|    |            |            |            |
|----|------------|------------|------------|
| C  | -1.1637365 | -0.4798534 | -0.4327560 |
| C  | 1.0029445  | -0.7684354 | -0.4142160 |
| C  | 0.1692945  | 1.2520746  | -0.4131060 |
| N  | 1.2815745  | 0.5287676  | -0.4306460 |
| N  | -1.0930585 | 0.8451886  | -0.4514360 |
| N  | -0.1795385 | -1.3696354 | -0.4528460 |
| F  | 2.0624845  | -1.5851754 | -0.4259760 |
| F  | -2.4004355 | -0.9897454 | -0.4640260 |
| F  | 0.3464525  | 2.5788446  | -0.4242460 |
| Cl | -0.0259815 | -0.0120304 | 3.9092540  |

**XX<sub>1</sub>:**

Energy = -1034.935143136

|    |            |            |            |
|----|------------|------------|------------|
| C  | -1.1749450 | -0.5437277 | -0.3277560 |
| C  | 0.9917360  | -0.8323097 | -0.3092160 |
| C  | 0.1580860  | 1.1882003  | -0.3081060 |
| N  | 1.2703660  | 0.4648933  | -0.3256460 |
| N  | -1.1042670 | 0.7813143  | -0.3464360 |
| N  | -0.1907470 | -1.4335097 | -0.3478460 |
| F  | 2.0512760  | -1.6490497 | -0.3209760 |
| F  | -2.4116440 | -1.0536197 | -0.3590260 |
| F  | 0.3352440  | 2.5149703  | -0.3192460 |
| Cl | 0.0748950  | 0.5628383  | 2.9642540  |

**XX<sub>2</sub>:**

Energy = -1034.933803234

|   |            |            |            |
|---|------------|------------|------------|
| C | -1.1707854 | -0.5124596 | -0.3627560 |
| C | 0.9958956  | -0.8010416 | -0.3442160 |
| C | 0.1622456  | 1.2194684  | -0.3431060 |
| N | 1.2745256  | 0.4961614  | -0.3606460 |
| N | -1.1001074 | 0.8125824  | -0.3814360 |
| N | -0.1865874 | -1.4022416 | -0.3828460 |
| F | 2.0554356  | -1.6177816 | -0.3559760 |
| F | -2.4074844 | -1.0223516 | -0.3940260 |

|    |           |           |            |
|----|-----------|-----------|------------|
| F  | 0.3394036 | 2.5462384 | -0.3542460 |
| Cl | 0.0374586 | 0.2814254 | 3.2792540  |

**xz<sub>3</sub>:**

Energy = -1034.929822258

|    |            |            |            |
|----|------------|------------|------------|
| C  | -1.1791046 | -0.5749958 | -0.3977560 |
| C  | 0.9875764  | -0.8635778 | -0.3792160 |
| C  | 0.1539264  | 1.1569322  | -0.3781060 |
| N  | 1.2662064  | 0.4336252  | -0.3956460 |
| N  | -1.1084266 | 0.7500462  | -0.4164360 |
| N  | -0.1949066 | -1.4647778 | -0.4178460 |
| F  | 2.0471164  | -1.6803178 | -0.3909760 |
| F  | -2.4158036 | -1.0848878 | -0.4290260 |
| F  | 0.3310844  | 2.4837022  | -0.3892460 |
| Cl | 0.1123314  | 0.8442512  | 3.5942540  |

**xz<sub>4</sub>:**

Energy = -1034.926637105

|    |            |            |            |
|----|------------|------------|------------|
| C  | -1.1832641 | -0.6062639 | -0.4327560 |
| C  | 0.9834169  | -0.8948459 | -0.4142160 |
| C  | 0.1497669  | 1.1256641  | -0.4131060 |
| N  | 1.2620469  | 0.4023571  | -0.4306460 |
| N  | -1.1125861 | 0.7187781  | -0.4514360 |
| N  | -0.1990661 | -1.4960459 | -0.4528460 |
| F  | 2.0429569  | -1.7115859 | -0.4259760 |
| F  | -2.4199631 | -1.1161559 | -0.4640260 |
| F  | 0.3269249  | 2.4524341  | -0.4242460 |
| Cl | 0.1497669  | 1.1256641  | 3.9092540  |

**Benzene, Z = 2.42**

**o:**

Energy = -392.4357566834

|    |            |            |            |
|----|------------|------------|------------|
| C  | -1.2228780 | 0.7060290  | -0.1727589 |
| C  | -1.2228780 | -0.7060290 | -0.1727589 |
| C  | 0.0000000  | -1.4120570 | -0.1727589 |
| C  | 1.2228780  | -0.7060290 | -0.1727589 |
| C  | 1.2228780  | 0.7060290  | -0.1727589 |
| C  | 0.0000000  | 1.4120570  | -0.1727589 |
| H  | -2.1690950 | 1.2523270  | -0.2021049 |
| H  | -2.1690950 | -1.2523270 | -0.2021049 |
| H  | 0.0000000  | -2.5046550 | -0.2021049 |
| H  | 2.1690950  | -1.2523270 | -0.2021049 |
| H  | 2.1690950  | 1.2523270  | -0.2021049 |
| H  | 0.0000000  | 2.5046550  | -0.2021049 |
| Na | 0.0000000  | 0.0000000  | 2.2491831  |

**x<sub>1</sub>:**

Energy = -392.4346312112

|    |            |            |            |
|----|------------|------------|------------|
| C  | 0.6788741  | -0.1727589 | -1.2228780 |
| C  | -0.7331839 | -0.1727589 | -1.2228780 |
| C  | -1.4392119 | -0.1727589 | 0.0000000  |
| C  | -0.7331839 | -0.1727589 | 1.2228780  |
| C  | 0.6788741  | -0.1727589 | 1.2228780  |
| C  | 1.3849021  | -0.1727589 | 0.0000000  |
| H  | 1.2251721  | -0.2021049 | -2.1690950 |
| H  | -1.2794819 | -0.2021049 | -2.1690950 |
| H  | -2.5318099 | -0.2021049 | 0.0000000  |
| H  | -1.2794819 | -0.2021049 | 2.1690950  |
| H  | 1.2251721  | -0.2021049 | 2.1690950  |
| H  | 2.4775001  | -0.2021049 | 0.0000000  |
| Na | 0.3258591  | 2.2491831  | 0.0000000  |

**x<sub>2</sub>:**

Energy = -392.4317902012

|   |           |            |            |
|---|-----------|------------|------------|
| C | 0.6517191 | -0.1727589 | -1.2228780 |
|---|-----------|------------|------------|

|    |            |            |            |
|----|------------|------------|------------|
| C  | -0.7603389 | -0.1727589 | -1.2228780 |
| C  | -1.4663669 | -0.1727589 | 0.0000000  |
| C  | -0.7603389 | -0.1727589 | 1.2228780  |
| C  | 0.6517191  | -0.1727589 | 1.2228780  |
| C  | 1.3577471  | -0.1727589 | 0.0000000  |
| H  | 1.1980171  | -0.2021049 | -2.1690950 |
| H  | -1.3066369 | -0.2021049 | -2.1690950 |
| H  | -2.5589649 | -0.2021049 | 0.0000000  |
| H  | -1.3066369 | -0.2021049 | 2.1690950  |
| H  | 1.1980171  | -0.2021049 | 2.1690950  |
| H  | 2.4503451  | -0.2021049 | 0.0000000  |
| Na | 0.6517191  | 2.2491831  | 0.0000000  |

**x<sub>3</sub>:**

Energy = -392.4284803862

|    |            |            |            |
|----|------------|------------|------------|
| C  | 0.6245642  | -0.1727589 | -1.2228780 |
| C  | -0.7874938 | -0.1727589 | -1.2228780 |
| C  | -1.4935218 | -0.1727589 | 0.0000000  |
| C  | -0.7874938 | -0.1727589 | 1.2228780  |
| C  | 0.6245642  | -0.1727589 | 1.2228780  |
| C  | 1.3305922  | -0.1727589 | 0.0000000  |
| H  | 1.1708622  | -0.2021049 | -2.1690950 |
| H  | -1.3337918 | -0.2021049 | -2.1690950 |
| H  | -2.5861198 | -0.2021049 | 0.0000000  |
| H  | -1.3337918 | -0.2021049 | 2.1690950  |
| H  | 1.1708622  | -0.2021049 | 2.1690950  |
| H  | 2.4231902  | -0.2021049 | 0.0000000  |
| Na | 0.9775782  | 2.2491831  | 0.0000000  |

**x<sub>4</sub>:**

Energy = -392.4257786396

|    |            |            |            |
|----|------------|------------|------------|
| C  | 0.5974092  | -0.1727589 | -1.2228780 |
| C  | -0.8146488 | -0.1727589 | -1.2228780 |
| C  | -1.5206768 | -0.1727589 | 0.0000000  |
| C  | -0.8146488 | -0.1727589 | 1.2228780  |
| C  | 0.5974092  | -0.1727589 | 1.2228780  |
| C  | 1.3034372  | -0.1727589 | 0.0000000  |
| H  | 1.1437072  | -0.2021049 | -2.1690950 |
| H  | -1.3609468 | -0.2021049 | -2.1690950 |
| H  | -2.6132748 | -0.2021049 | 0.0000000  |
| H  | -1.3609468 | -0.2021049 | 2.1690950  |
| H  | 1.1437072  | -0.2021049 | 2.1690950  |
| H  | 2.3960352  | -0.2021049 | 0.0000000  |
| Na | 1.3034372  | 2.2491831  | 0.0000000  |

**y<sub>1</sub>:**

Energy = -392.4349036792

|    |            |            |            |
|----|------------|------------|------------|
| C  | -1.2463948 | 0.1727589  | 0.7060290  |
| C  | -1.2463948 | 0.1727589  | -0.7060290 |
| C  | -0.0235168 | 0.1727589  | -1.4120570 |
| C  | 1.1993612  | 0.1727589  | -0.7060290 |
| C  | 1.1993612  | 0.1727589  | 0.7060290  |
| C  | -0.0235168 | 0.1727589  | 1.4120570  |
| H  | -2.1926118 | 0.2021049  | 1.2523270  |
| H  | -2.1926118 | 0.2021049  | -1.2523270 |
| H  | -0.0235168 | 0.2021049  | -2.5046550 |
| H  | 2.1455782  | 0.2021049  | -1.2523270 |
| H  | 2.1455782  | 0.2021049  | 1.2523270  |
| H  | -0.0235168 | 0.2021049  | 2.5046550  |
| Na | 0.2822022  | -2.2491831 | 0.0000000  |

**y<sub>2</sub>:**

Energy = -392.4326602048

|   |            |           |            |
|---|------------|-----------|------------|
| C | -1.2699118 | 0.1727589 | 0.7060290  |
| C | -1.2699118 | 0.1727589 | -0.7060290 |

|    |            |            |            |
|----|------------|------------|------------|
| C  | -0.0470338 | 0.1727589  | -1.4120570 |
| C  | 1.1758442  | 0.1727589  | -0.7060290 |
| C  | 1.1758442  | 0.1727589  | 0.7060290  |
| C  | -0.0470338 | 0.1727589  | 1.4120570  |
| H  | -2.2161288 | 0.2021049  | 1.2523270  |
| H  | -2.2161288 | 0.2021049  | -1.2523270 |
| H  | -0.0470338 | 0.2021049  | -2.5046550 |
| H  | 2.1220612  | 0.2021049  | -1.2523270 |
| H  | 2.1220612  | 0.2021049  | 1.2523270  |
| H  | -0.0470338 | 0.2021049  | 2.5046550  |
| Na | 0.5644052  | -2.2491831 | 0.0000000  |

**Y<sub>3</sub>:**

Energy = -392.4298297739

|    |            |            |            |
|----|------------|------------|------------|
| C  | -1.2934286 | 0.1727589  | 0.7060290  |
| C  | -1.2934286 | 0.1727589  | -0.7060290 |
| C  | -0.0705506 | 0.1727589  | -1.4120570 |
| C  | 1.1523274  | 0.1727589  | -0.7060290 |
| C  | 1.1523274  | 0.1727589  | 0.7060290  |
| C  | -0.0705506 | 0.1727589  | 1.4120570  |
| H  | -2.2396456 | 0.2021049  | 1.2523270  |
| H  | -2.2396456 | 0.2021049  | -1.2523270 |
| H  | -0.0705506 | 0.2021049  | -2.5046550 |
| H  | 2.0985444  | 0.2021049  | -1.2523270 |
| H  | 2.0985444  | 0.2021049  | 1.2523270  |
| H  | -0.0705506 | 0.2021049  | 2.5046550  |
| Na | 0.8466074  | -2.2491831 | 0.0000000  |

**Y<sub>4</sub>:**

Energy = -392.4272815038

|    |            |            |            |
|----|------------|------------|------------|
| C  | -1.3169455 | 0.1727589  | 0.7060290  |
| C  | -1.3169455 | 0.1727589  | -0.7060290 |
| C  | -0.0940675 | 0.1727589  | -1.4120570 |
| C  | 1.1288105  | 0.1727589  | -0.7060290 |
| C  | 1.1288105  | 0.1727589  | 0.7060290  |
| C  | -0.0940675 | 0.1727589  | 1.4120570  |
| H  | -2.2631625 | 0.2021049  | 1.2523270  |
| H  | -2.2631625 | 0.2021049  | -1.2523270 |
| H  | -0.0940675 | 0.2021049  | -2.5046550 |
| H  | 2.0750275  | 0.2021049  | -1.2523270 |
| H  | 2.0750275  | 0.2021049  | 1.2523270  |
| H  | -0.0940675 | 0.2021049  | 2.5046550  |
| Na | 1.1288105  | -2.2491831 | 0.0000000  |

**Y = 0**

**z<sub>1</sub>:**

Energy = -392.4330240076

|    |            |            |            |
|----|------------|------------|------------|
| C  | -1.2228780 | 0.7060290  | -0.1996820 |
| C  | -1.2228780 | -0.7060290 | -0.1996820 |
| C  | 0.0000000  | -1.4120570 | -0.1996820 |
| C  | 1.2228780  | -0.7060290 | -0.1996820 |
| C  | 1.2228780  | 0.7060290  | -0.1996820 |
| C  | 0.0000000  | 1.4120570  | -0.1996820 |
| H  | -2.1690950 | 1.2523270  | -0.2290280 |
| H  | -2.1690950 | -1.2523270 | -0.2290280 |
| H  | 0.0000000  | -2.5046550 | -0.2290280 |
| H  | 2.1690950  | -1.2523270 | -0.2290280 |
| H  | 2.1690950  | 1.2523270  | -0.2290280 |
| H  | 0.0000000  | 2.5046550  | -0.2290280 |
| Na | 0.0000000  | 0.0000000  | 2.5722600  |

**z<sub>2</sub>:**

Energy = -392.4267148630

|   |            |           |            |
|---|------------|-----------|------------|
| C | -1.2228780 | 0.7060290 | -0.2266051 |
|---|------------|-----------|------------|

|    |            |            |            |
|----|------------|------------|------------|
| C  | -1.2228780 | -0.7060290 | -0.2266051 |
| C  | 0.0000000  | -1.4120570 | -0.2266051 |
| C  | 1.2228780  | -0.7060290 | -0.2266051 |
| C  | 1.2228780  | 0.7060290  | -0.2266051 |
| C  | 0.0000000  | 1.4120570  | -0.2266051 |
| H  | -2.1690950 | 1.2523270  | -0.2559511 |
| H  | -2.1690950 | -1.2523270 | -0.2559511 |
| H  | 0.0000000  | -2.5046550 | -0.2559511 |
| H  | 2.1690950  | -1.2523270 | -0.2559511 |
| H  | 2.1690950  | 1.2523270  | -0.2559511 |
| H  | 0.0000000  | 2.5046550  | -0.2559511 |
| Na | 0.0000000  | 0.0000000  | 2.8953369  |

**Z<sub>3</sub>:**

Energy = -392.4204868488

|    |            |            |            |
|----|------------|------------|------------|
| C  | -1.2228780 | 0.7060290  | -0.2535282 |
| C  | -1.2228780 | -0.7060290 | -0.2535282 |
| C  | 0.0000000  | -1.4120570 | -0.2535282 |
| C  | 1.2228780  | -0.7060290 | -0.2535282 |
| C  | 1.2228780  | 0.7060290  | -0.2535282 |
| C  | 0.0000000  | 1.4120570  | -0.2535282 |
| H  | -2.1690950 | 1.2523270  | -0.2828742 |
| H  | -2.1690950 | -1.2523270 | -0.2828742 |
| H  | 0.0000000  | -2.5046550 | -0.2828742 |
| H  | 2.1690950  | -1.2523270 | -0.2828742 |
| H  | 2.1690950  | 1.2523270  | -0.2828742 |
| H  | 0.0000000  | 2.5046550  | -0.2828742 |
| Na | 0.0000000  | 0.0000000  | 3.2184138  |

**Z<sub>4</sub>:**

Energy = -392.4153467729

|    |            |            |            |
|----|------------|------------|------------|
| C  | -1.2228780 | 0.7060290  | -0.2804512 |
| C  | -1.2228780 | -0.7060290 | -0.2804512 |
| C  | 0.0000000  | -1.4120570 | -0.2804512 |
| C  | 1.2228780  | -0.7060290 | -0.2804512 |
| C  | 1.2228780  | 0.7060290  | -0.2804512 |
| C  | 0.0000000  | 1.4120570  | -0.2804512 |
| H  | -2.1690950 | 1.2523270  | -0.3097972 |
| H  | -2.1690950 | -1.2523270 | -0.3097972 |
| H  | 0.0000000  | -2.5046550 | -0.3097972 |
| H  | 2.1690950  | -1.2523270 | -0.3097972 |
| H  | 2.1690950  | 1.2523270  | -0.3097972 |
| H  | 0.0000000  | 2.5046550  | -0.3097972 |
| Na | 0.0000000  | 0.0000000  | 3.5414908  |

**XX<sub>1</sub>:**

Energy = -392.4312213789

|    |            |            |            |
|----|------------|------------|------------|
| C  | 0.6517191  | -0.1996820 | -1.2228780 |
| C  | -0.7603389 | -0.1996820 | -1.2228780 |
| C  | -1.4663669 | -0.1996820 | 0.0000000  |
| C  | -0.7603389 | -0.1996820 | 1.2228780  |
| C  | 0.6517191  | -0.1996820 | 1.2228780  |
| C  | 1.3577471  | -0.1996820 | 0.0000000  |
| H  | 1.1980171  | -0.2290280 | -2.1690950 |
| H  | -1.3066369 | -0.2290280 | -2.1690950 |
| H  | -2.5589649 | -0.2290280 | 0.0000000  |
| H  | -1.3066369 | -0.2290280 | 2.1690950  |
| H  | 1.1980171  | -0.2290280 | 2.1690950  |
| H  | 2.4503451  | -0.2290280 | 0.0000000  |
| Na | 0.6517191  | 2.5722600  | 0.0000000  |

**XX<sub>2</sub>:**

Energy = -392.4243821505

|   |            |            |            |
|---|------------|------------|------------|
| C | 0.6245642  | -0.2266051 | -1.2228780 |
| C | -0.7874938 | -0.2266051 | -1.2228780 |

|    |            |            |            |
|----|------------|------------|------------|
| C  | -1.4935218 | -0.2266051 | 0.0000000  |
| C  | -0.7874938 | -0.2266051 | 1.2228780  |
| C  | 0.6245642  | -0.2266051 | 1.2228780  |
| C  | 1.3305922  | -0.2266051 | 0.0000000  |
| H  | 1.1708622  | -0.2559511 | -2.1690950 |
| H  | -1.3337918 | -0.2559511 | -2.1690950 |
| H  | -2.5861198 | -0.2559511 | 0.0000000  |
| H  | -1.3337918 | -0.2559511 | 2.1690950  |
| H  | 1.1708622  | -0.2559511 | 2.1690950  |
| H  | 2.4231902  | -0.2559511 | 0.0000000  |
| Na | 0.9775782  | 2.8953369  | 0.0000000  |

**xz<sub>3</sub>:**

Energy = -392.4203087092

|    |            |            |            |
|----|------------|------------|------------|
| C  | 0.6788741  | -0.2535282 | -1.2228780 |
| C  | -0.7331839 | -0.2535282 | -1.2228780 |
| C  | -1.4392119 | -0.2535282 | 0.0000000  |
| C  | -0.7331839 | -0.2535282 | 1.2228780  |
| C  | 0.6788741  | -0.2535282 | 1.2228780  |
| C  | 1.3849021  | -0.2535282 | 0.0000000  |
| H  | 1.2251721  | -0.2828742 | -2.1690950 |
| H  | -1.2794819 | -0.2828742 | -2.1690950 |
| H  | -2.5318099 | -0.2828742 | 0.0000000  |
| H  | -1.2794819 | -0.2828742 | 2.1690950  |
| H  | 1.2251721  | -0.2828742 | 2.1690950  |
| H  | 2.4775001  | -0.2828742 | 0.0000000  |
| Na | 0.3258591  | 3.2184138  | 0.0000000  |

**xz<sub>4</sub>:**

Energy = -392.4130362902

|    |            |            |            |
|----|------------|------------|------------|
| C  | 0.5974092  | -0.2804512 | -1.2228780 |
| C  | -0.8146488 | -0.2804512 | -1.2228780 |
| C  | -1.5206768 | -0.2804512 | 0.0000000  |
| C  | -0.8146488 | -0.2804512 | 1.2228780  |
| C  | 0.5974092  | -0.2804512 | 1.2228780  |
| C  | 1.3034372  | -0.2804512 | 0.0000000  |
| H  | 1.1437072  | -0.3097972 | -2.1690950 |
| H  | -1.3609468 | -0.3097972 | -2.1690950 |
| H  | -2.6132748 | -0.3097972 | 0.0000000  |
| H  | -1.3609468 | -0.3097972 | 2.1690950  |
| H  | 1.1437072  | -0.3097972 | 2.1690950  |
| H  | 2.3960352  | -0.3097972 | 0.0000000  |
| Na | 1.3034372  | 3.5414908  | 0.0000000  |
